# Supplementary material for: Prevalence of Avian Influenza A(H5) and A(H9) Viruses in Live Bird Markets, Bangladesh
Source: PubMed Central journal article supplement (PMC6256373; doi:10.3201/eid2412.180879), 2018-12
Supplement: 18-0879-Techapp-s1.pdf [file 18-0879-Techapp-s1.pdf]

# Prevalence of Avian Influenza A(H5) and A(H9) Viruses in Live Bird Markets, Bangladesh

## Technical Appendix 2.

**Technical Appendix 2 Table 1.** Prevalence of avian influenza A(H5) and A(H9) viruses in poultry samples from live bird markets, Bangladesh\*

| Sample           | No. pools† | Pool-level H5 virus prevalence, % |               |             | Pool-level H9 virus prevalence, % |               |             |
|------------------|------------|-----------------------------------|---------------|-------------|-----------------------------------|---------------|-------------|
|                  |            | Cloacal                           | Oropharyngeal | Combined‡   | Cloacal                           | Oropharyngeal | Combined‡   |
| <b>Chicken</b>   |            |                                   |               |             |                                   |               |             |
| Broiler          | 153        | 0.7                               | 3.3           | 3.9         | 13.1                              | 39.2          | 41.2        |
| Sonali           | 122        | 2.5                               | 6.6           | 6.6         | 9.8                               | 29.2          | 32.0        |
| Desi             | 127        | 2.4                               | 5.5           | 6.3         | 7.1                               | 33.9          | 34.6        |
| Subtotal         | 402        | 1.7                               | 5.0           | 5.5         | 10.2                              | 34.6          | 36.3        |
| <b>Waterfowl</b> |            |                                   |               |             |                                   |               |             |
| Duck             | 57         | 14.0                              | 29.8          | 36.8        | 8.8                               | 17.5          | 19.3        |
| Goose            | 18         | 11.1                              | 22.2          | 22.2        | 5.6                               | 16.7          | 16.7        |
| Subtotal         | 75         | 13.3                              | 28.0          | 33.3        | 8.0                               | 17.3          | 18.7        |
| <b>Total</b>     | <b>477</b> | <b>3.6</b>                        | <b>8.6</b>    | <b>10.3</b> | <b>9.9</b>                        | <b>31.9</b>   | <b>30.0</b> |

\*Desi, "local" in Bengali, are indigenous chicken breeds raised in backyard farms. Sonali is a cross-breed of the Rhode Island Red cocks and Fayoumi hens.

†When a given type of poultry was not available, other types of poultry were sampled. All pools contained 5 swab specimens, except for 1 pair of cloacal and oropharyngeal pools from geese, which contained 4 swab specimens.

‡A pool was considered positive if any of its cloacal and oropharyngeal pools showed positive results.

**Technical Appendix 2 Table 2.** Prevalence of avian influenza A(H5) and A(H9) viruses in environmental samples from live bird markets, Bangladesh

| Sample                                   | No. pools* | Pool-level H5 virus prevalence, % | Pool-level H9 virus prevalence, % |
|------------------------------------------|------------|-----------------------------------|-----------------------------------|
| <b>Stall area†</b>                       |            |                                   |                                   |
| Water run-off                            | 34         | 8.8                               | 8.8                               |
| Poultry cage floor                       | 40         | 15.0                              | 22.5                              |
| Poultry display table                    | 40         | 10.0                              | 22.5                              |
| Poultry drinking water                   | 40         | 5.0                               | 27.5                              |
| Poultry waste disposal area/bin          | 36         | 19.4                              | 22.2                              |
| Floor in the area where poultry are kept | 13         | 0.0                               | 7.7                               |
| Subtotal                                 | 203        | 10.8                              | 20.2                              |
| <b>Slaughtering area</b>                 |            |                                   |                                   |
| Water run-off                            | 40         | 10.0                              | 35.0                              |
| Floor of slaughtering area               | 40         | 12.5                              | 25.0                              |
| Poultry waste disposal area/bin          | 37         | 10.8                              | 27.0                              |
| Chopping and slaughtering table          | 40         | 10.0                              | 32.5                              |
| Slaughtering and processing knives/board | 40         | 10.0                              | 37.5                              |
| Subtotal                                 | 197        | 10.7                              | 31.5                              |
| <b>Total</b>                             | <b>400</b> | <b>10.8</b>                       | <b>25.8</b>                       |

\*When a given type of environmental site was not available, other types of environmental site were sampled.

†In each live bird market, 5 of 6 environmental sites were sampled depending on their availability.

**Technical Appendix 2 Table 3.** LBM-level prevalence of avian influenza A(H5) virus estimated from best H5 models, Bangladesh\*

| Sample type   | No. LBMs | Median prevalence, % (95% HDI) |
|---------------|----------|--------------------------------|
| Poultry       | 40       | 88.7 (69.1–100.0)              |
| Environmental | 40       | 91.9 (74.7–100.0)              |

\*HDI, high-density interval; LBM, live bird market.

**Technical Appendix 2 Table 4.** Pool-, bird-, and environmental swab specimen-level prevalence of avian influenza A(H5) virus estimated from best H5 models, Bangladesh\*

| Sample             | No. pools | Pool-level prevalence, % | Bird-level median prevalence, % (95% HDI)† |
|--------------------|-----------|--------------------------|--------------------------------------------|
| Poultry            |           |                          |                                            |
| Chicken            | 402       | 5.5                      | 1.5 (0–4.0)                                |
| Waterfowl          | 75        | 33.3                     | 8.9 (0.2–22.1)                             |
| Environmental Area | 400       | 12.0                     | 2.6 (0.1–6.9)                              |

\*HDI, high-density interval.

†Bird- and environmental swab specimen-level prevalence in contaminated live bird markets from the best H5 models.

**Technical Appendix 2 Table 5.** LBM-level prevalence of avian influenza A(H9) virus estimated from best H9 models, Bangladesh\*

| Sample type   | No. LBMs | Median prevalence, % (95% HDI) |
|---------------|----------|--------------------------------|
| Poultry       | 40       | 98.0 (91.8–100.0)              |
| Environmental | 40       | 97.6 (90.3–100.0)              |

\*HDI, high-density interval; LBM, live bird market.

**Technical Appendix 2 Table 6.** Pool-, bird-, and environmental swab specimen-level prevalence of avian influenza A(H9) virus estimated from best H9 models, Bangladesh\*

| Sample            | No. pools | Pool-level prevalence, % | Bird-level median prevalence (95% HDI)† |
|-------------------|-----------|--------------------------|-----------------------------------------|
| Poultry           |           |                          |                                         |
| Chicken           | 153       | 41.2                     | 12.0 (4.8–21.1)                         |
| Sonali            | 122       | 32.0                     | 7.3 (2.7–13.5)                          |
| Desi              | 127       | 34.6                     | 7.6 (2.8–13.9)                          |
| Waterfowl         | 75        | 18.7                     | 3.1 (0.8–6.6)                           |
| Environmental     |           |                          |                                         |
| Stall area        | 203       | 20.8                     | 4.0 (1.0–8.7)                           |
| Slaughtering area | 197       | 30.5                     | 7.7 (2.1–15.8)                          |

\*HDI, high-density interval. Desi, “local” in Bengali, are indigenous chicken breeds raised in backyard farms.

Sonali is a cross-breed of the Rhode Island Red cocks and Fayoumi hens.

†Bird- and environmental swab specimen-level prevalence in contaminated live bird markets from the best H9 models.

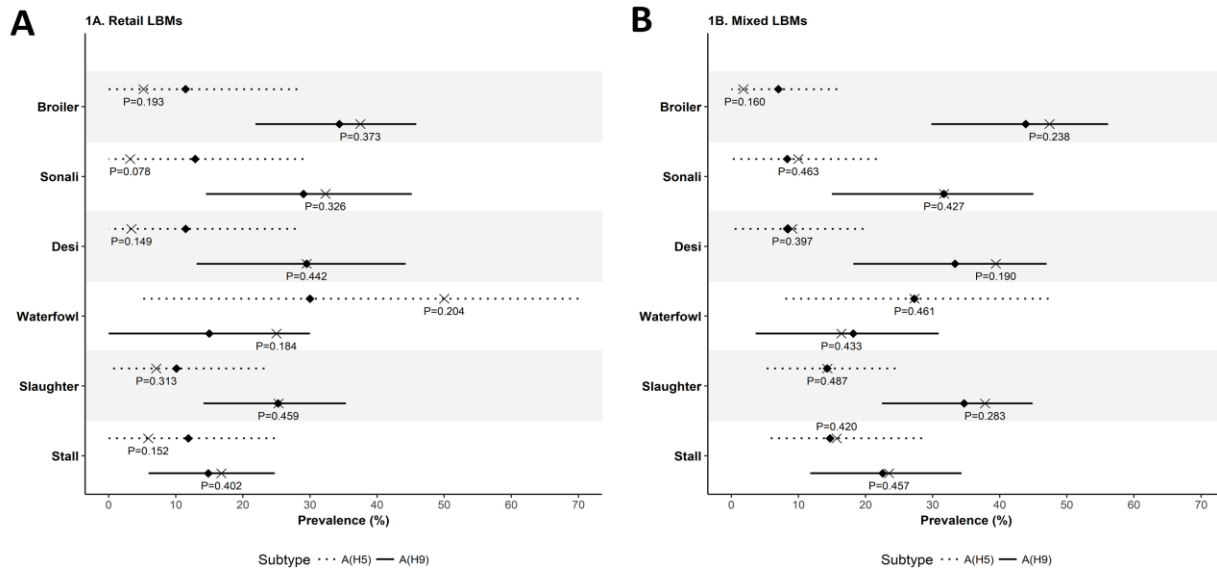

**Technical Appendix 2 Figure 1.** Posterior predictive checks of the models presented for analysis of prevalence of avian influenza A(H5) and A(H9) viruses in live bird markets, Bangladesh. A) Retail live bird

markets; B) mixed live bird markets. Dotted lines indicate H5 subtypes, and solid lines indicate H9 subtypes. Diamonds indicate median values, horizontal bars indicate 95% high-density interval of the posterior predictive distribution, and  $\times$ s indicate observed pool-level prevalences. p values correspond to the proportion of posterior predictive values that are equal to or more extreme than the observed prevalence. Desi, “local” in Bengali, are indigenous chicken breeds raised in backyard farms. Sonali is a cross-breed of the Rhode Island Red cocks and Fayoumi hens.

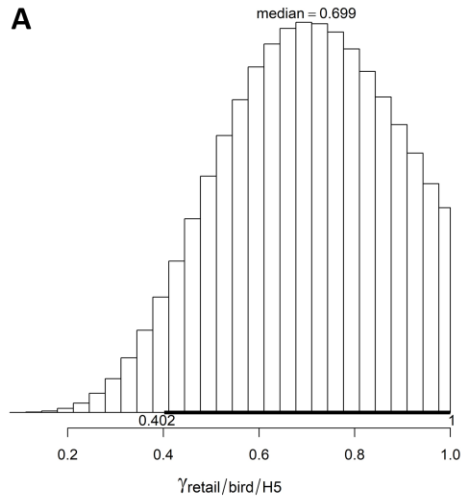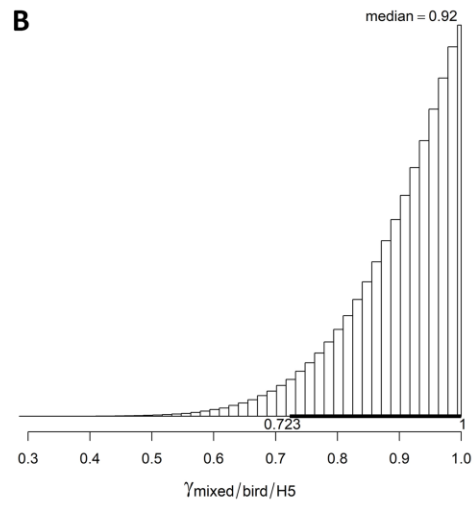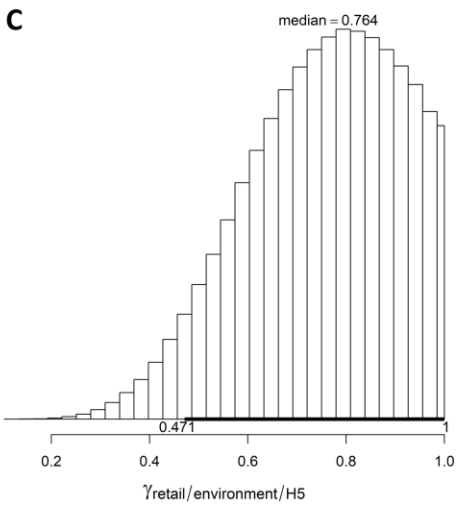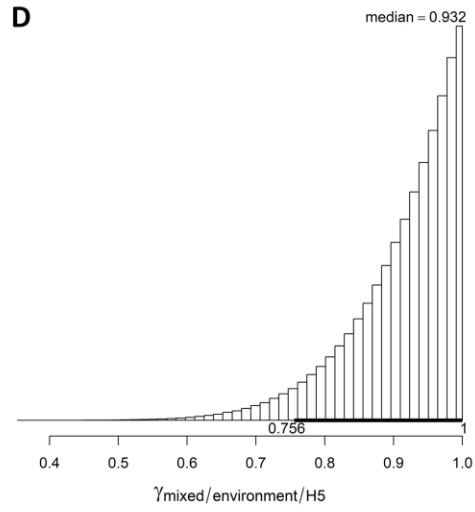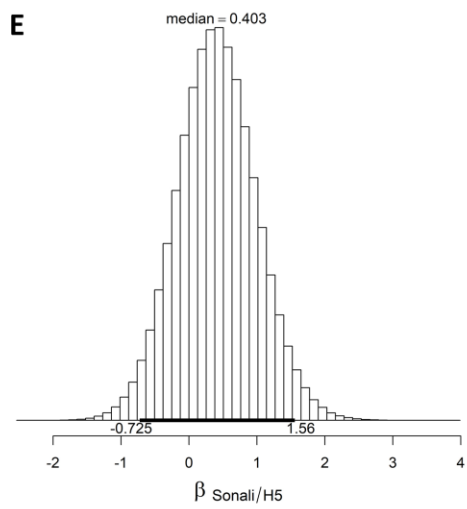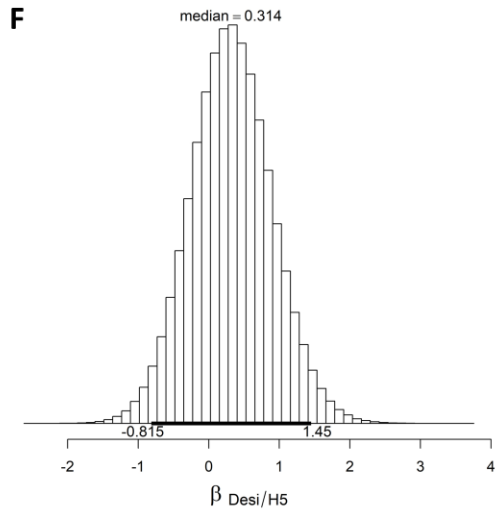

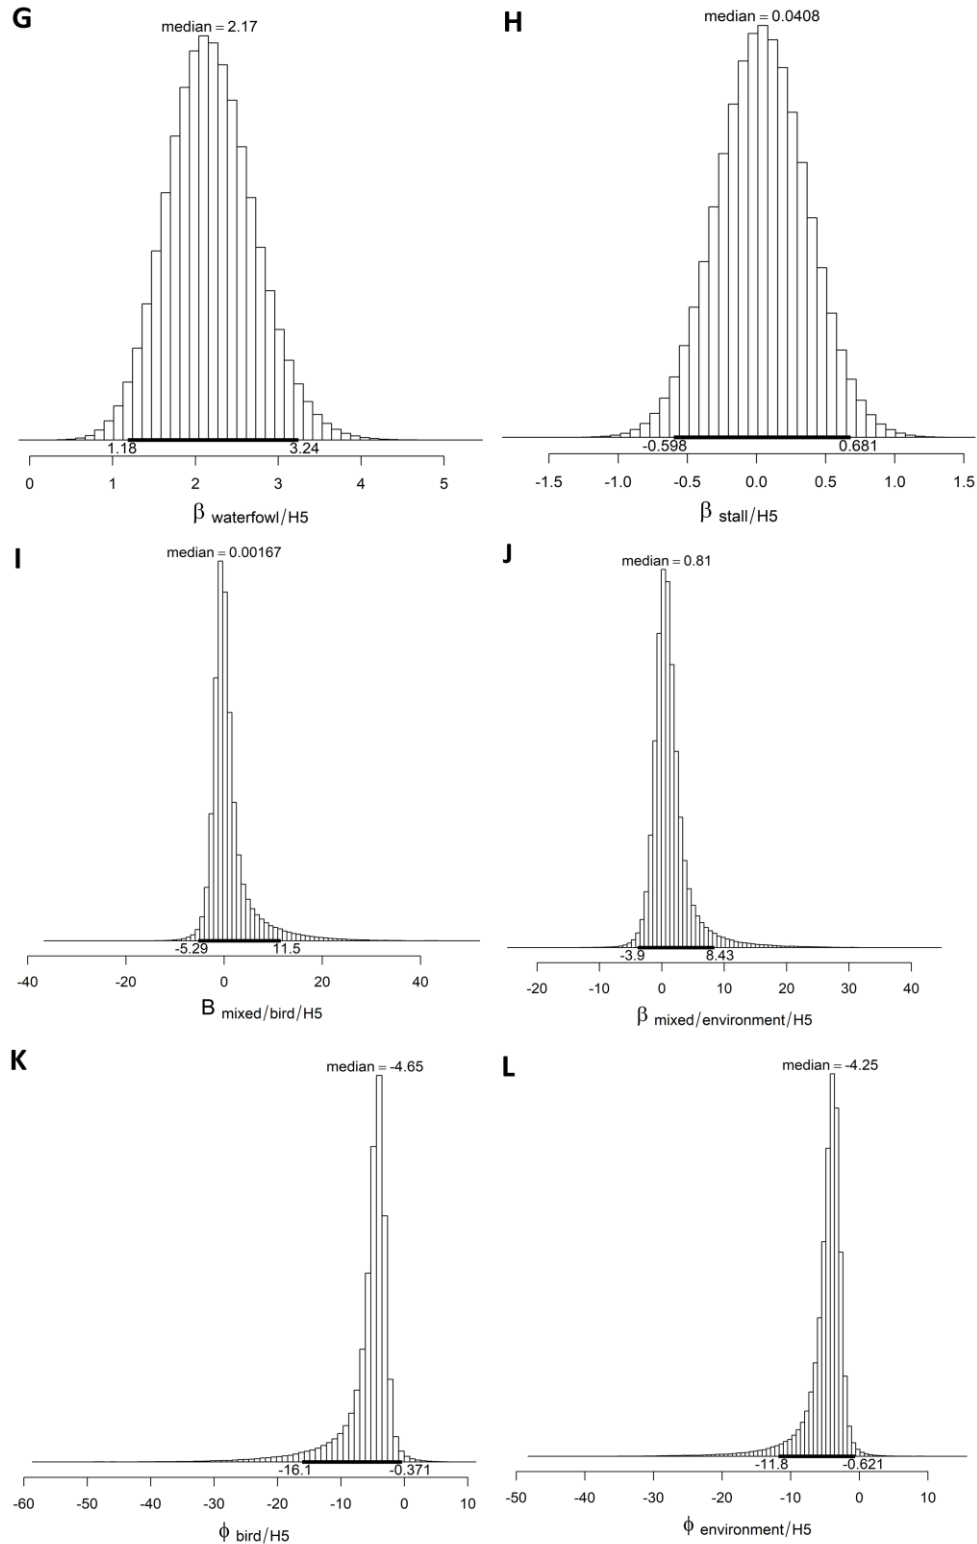

**Technical Appendix 2 Figure 2.** Posterior distribution of parameters used in models for prevalence of avian influenza A(H5) subtype virus in live bird markets, Bangladesh. Desi, “local” in Bengali, are indigenous chicken breeds raised in backyard farms. Sonali is a cross-breed of the Rhode Island Red

cocks and Fayoumi hens. Values along baselines are medians. Solid horizontal bars indicate 95% high density intervals. Each panel (A–L) shows a different situation that is listed at the bottom of each figure panel. A)  $\gamma$ /retail/bird/H5; B)  $\gamma$ /mixedI/bird/H5; C)  $\gamma$ /retail/environment/H5; D)  $\gamma$ /mixed/environment/H5; E)  $\beta$ /Sonalii/H5; F)  $\beta$ /Desii/H5; G)  $\beta$ /waterfowl/H5; H)  $\beta$ /stall/H5; I) B/mixed/bird/H5; J)  $\beta$ /mixed/environment/H5; K)  $\phi$ /bird/H5; L)  $\phi$ /environment/H5.

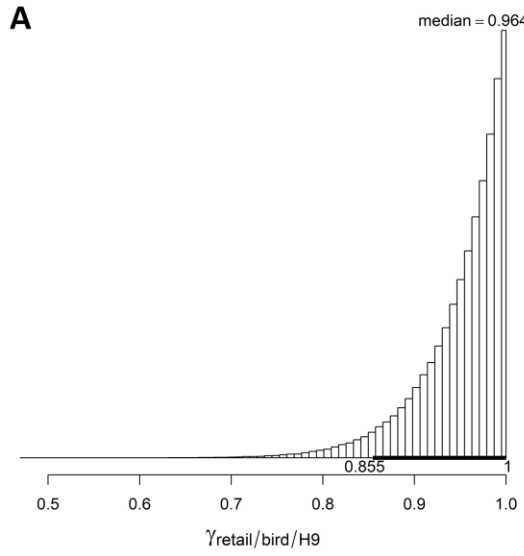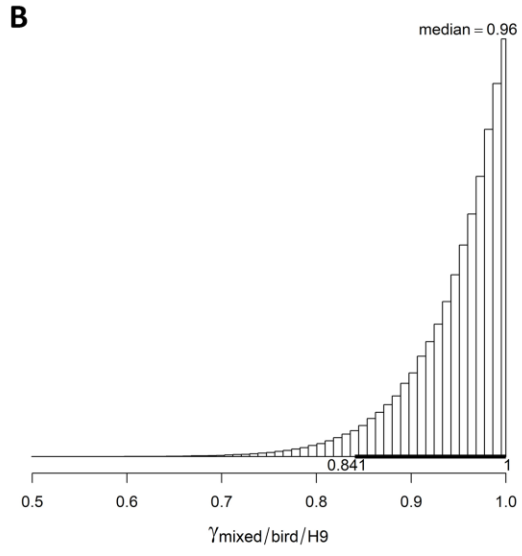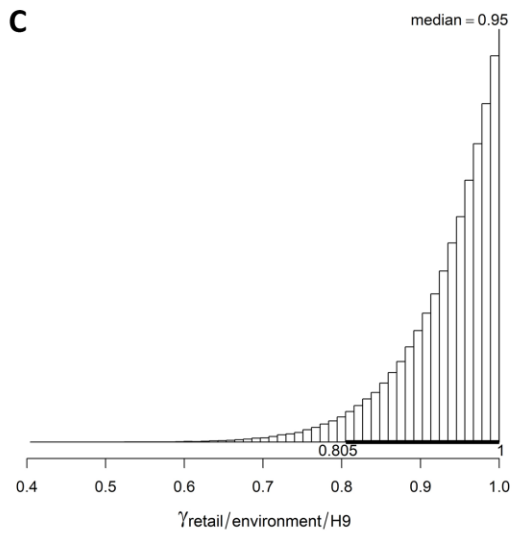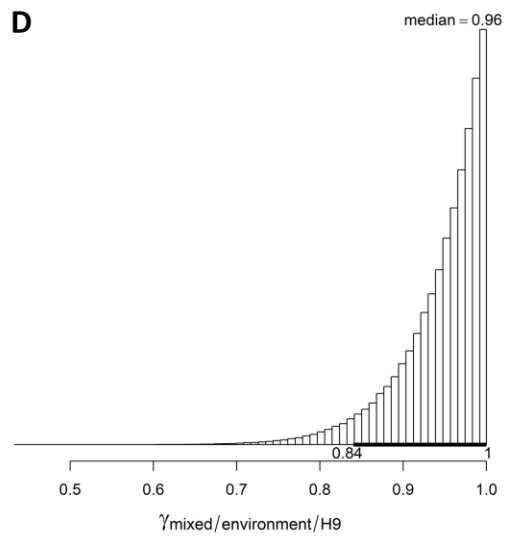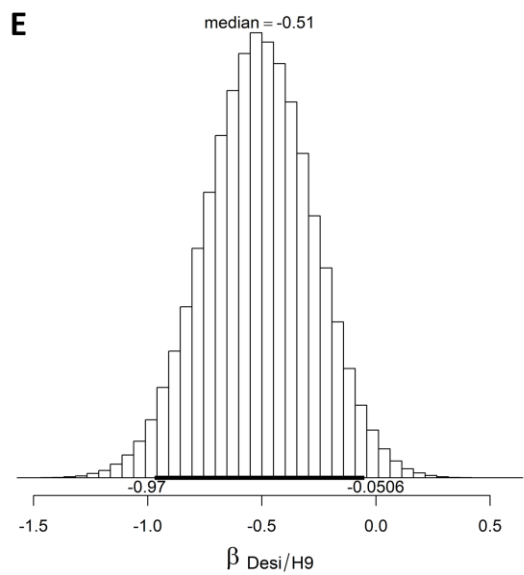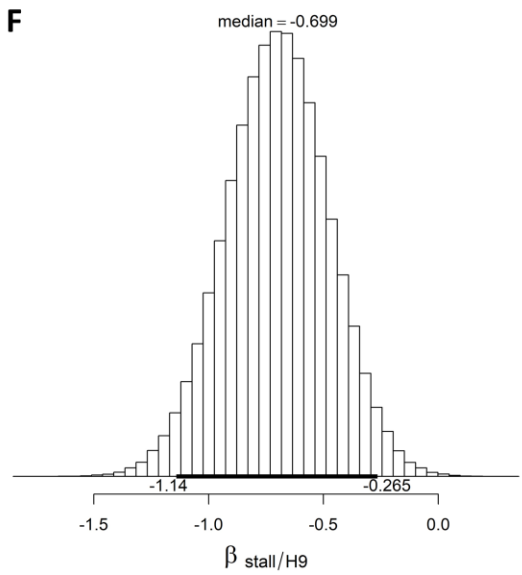

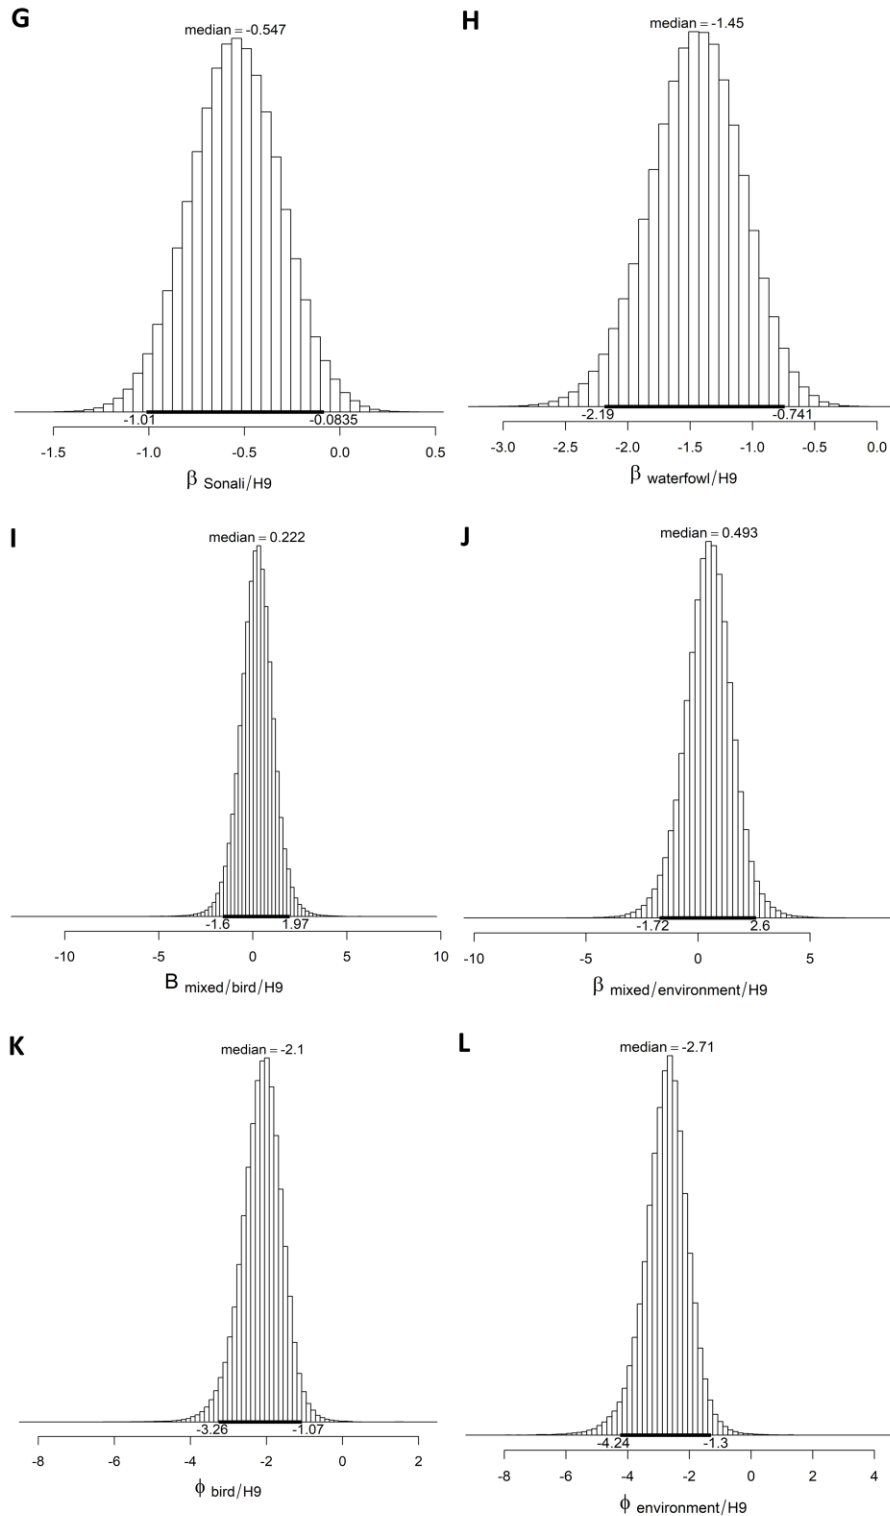

**Technical Appendix 2 Figure 3.** Posterior distribution of parameters used in models for prevalence of avian influenza A(H9) subtype virus in live bird markets, Bangladesh. Desi, “local” in Bengali, are indigenous chicken breeds raised in backyard farms. Sonali is a cross-breed of the Rhode Island Red



cocks and Fayoumi hens. Values along baselines are medians. Solid horizontal bars indicate 95% high density intervals. Each panel (A–L) shows a different situation that is listed at the bottom of each figure panel. A)  $\gamma_{\text{retail/bird/H9}}$ ; B)  $\gamma_{\text{mixedI/bird/H9}}$ ; C)  $\gamma_{\text{retail/environment/H9}}$ ; D)  $\gamma_{\text{mixed/environment/H9}}$ ; E)  $\beta_{\text{Desi//H9}}$ ; F)  $\beta_{\text{stall/H9}}$ ; G)  $\beta_{\text{Sonali/H9}}$ ; H)  $\beta_{\text{waterfowl/H9}}$ ; I)  $B_{\text{mixed/bird/H9}}$ ; J)  $\beta_{\text{mixed/environment/H9}}$ ; K)  $\phi_{\text{bird/H9}}$ ; L)  $\phi_{\text{environment/H9}}$ .
